# Supplementary material
Source: publisher figshare collection journal article supplement (https://gsajournals.figshare.com/ndownloader/files/14217734)
Supplement: Supplementary file 1 [file 14217734]

**JBrowse Navigation**

The SNP and SSR genetic markers and QTL projected onto the *Ae. tauschii* genome sequence were incorporated into the *Ae. tauschii* JBrowse (v1.11.4) as marker and QTL tracks (<http://aegilops.wheat.ucdavis.edu/jbrowse/index.html?data=Aet/data>). A scroll-down panel in the JBrowse includes QTL identification number (ID), which starts with the letter “Q” followed by a four-digit number. The QTL naming system is described in Methods. Also indicated in the scroll-down panel is the starting nucleotide of a marker with which the QTL is associated (location) on the *Ae. tauschii* pseudomolecule. QTL projected onto the *Ae. tauschii* pseudomolecules via associations with single markers are projected on the sequence as the starting nucleotide of the marker on the pseudomolecule. QTL that were projected on the *Ae. tauschii* pseudomolecules by two flanking markers are positioned on the *Ae. tauschii* pseudomolecule at the midpoint between the two markers. In either case, QTL location on the pseudomolecule is defined as the starting nucleotide of the marker and its length is therefore 1bp. Marker information includes marker name, its type, marker sequence, and the reference. SSR-associated QTL are designated as “SSR” in the field “Marker type” and SNP-associated QTL are designated by the corresponding SNP assay. Marker sequence information is in the field “Region sequence”. For SSR-associated QTL, two primer sequences are presented whereas probe sequences are given for SNP-associated QTL.
